# Supplementary material for: A family of cationic oxime-based hexametallic manganese(iii) single-molecule magnets
Source: Royal Society of Chemistry journal article supplement (doi:10.1039/c3dt52640b), 2013-11-11
Supplement: c3dt52640b.pdf [file c3dt52640b.pdf]

## Electronic Supplementary Information (ESI)

### A family of cationic oxime-based hexametallc manganese(III) single-molecule magnets

José Martínez-Lillo,\* Neil Dolan and Euan K. Brechin

*EaStCHEM School of Chemistry, The University of Edinburgh, West Mains Road, EH9 3JJ, Edinburgh, Scotland, UK. E-mail: [fmartine@staffmail.ed.ac.uk](mailto:fmartine@staffmail.ed.ac.uk). Tel: +44 (0)131 650 7545.*

A)

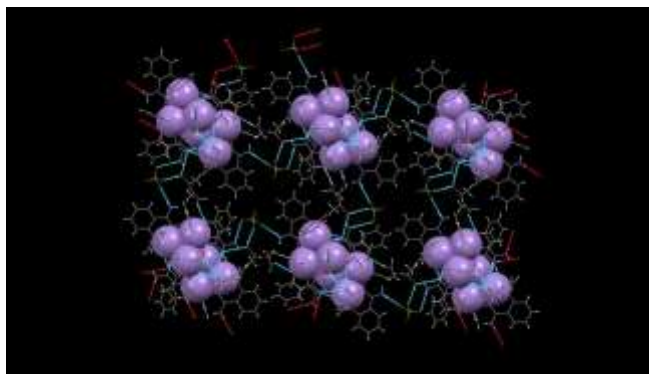

B)

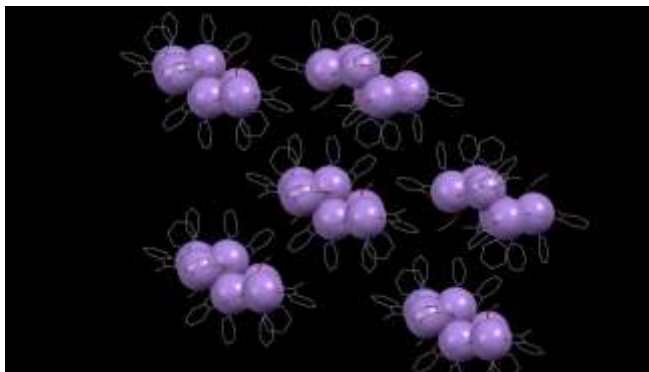

**Figure S1.** (A) View of the H-bonded square sheets of  $[\text{Mn}_6(\mu_3\text{-O})_2(\text{H}_2\text{N-sao})_6(\text{py})_6(\text{EtOH})_2]^{2+}$  cations and  $\text{ClO}_4^-$  anions in **1** (dashed lines). (B) View of the interdigitated  $[\text{Mn}_6]^{2+}$  cluster cations in the third dimension. Solvent molecules have been omitted for clarity. [Colour code: purple, Mn; red, O; blue, N; black, C; green, Cl].

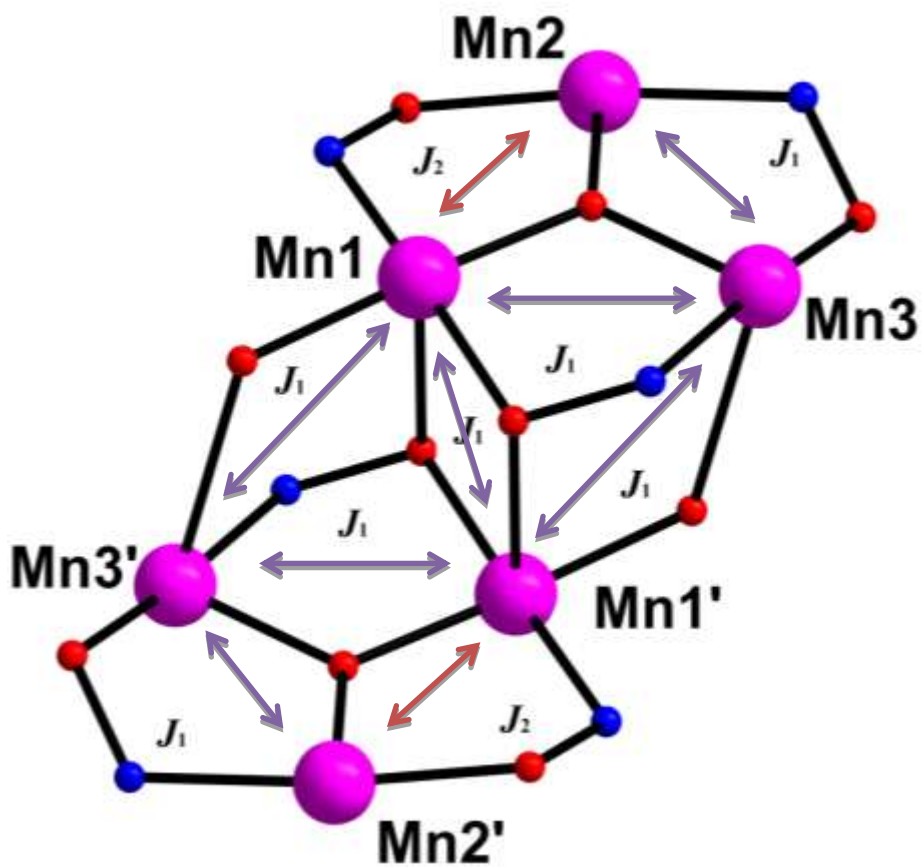

**Figure S2.** The two  $J$  coupling exchange model used for the fit of compounds 1-3.

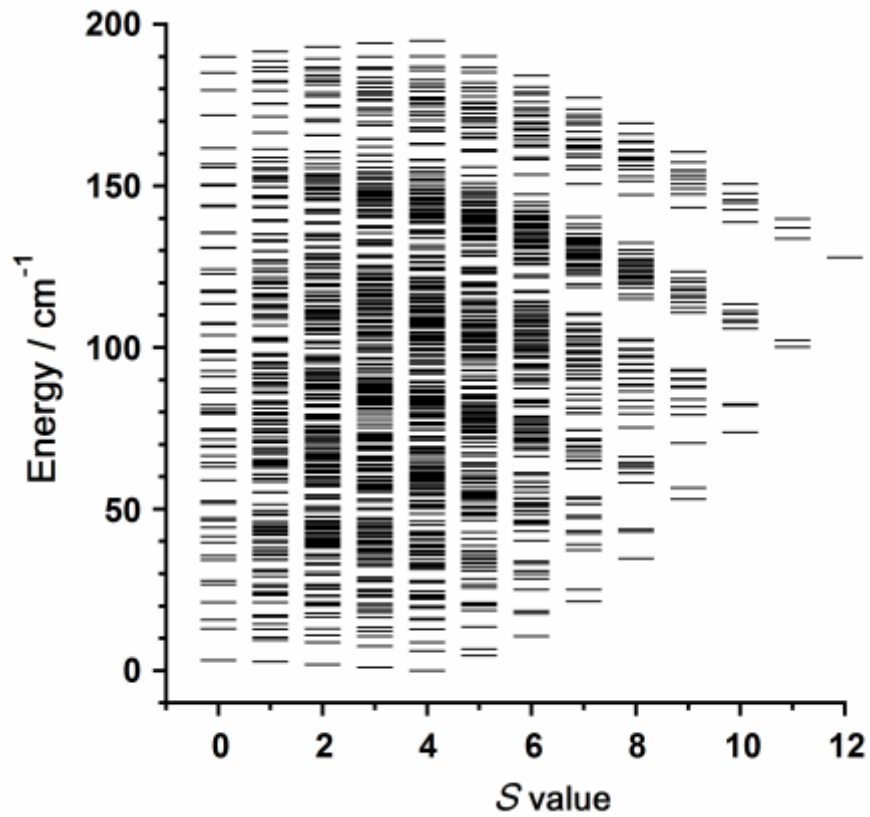

**Figure S3.** Plot of energy *versus* total spin ( $S$ ) extracted from the isotropic fit of the susceptibility data for **3**.
